# Supplementary material for: Human umbilical cord mesenchymal stromal cells attenuate pulmonary fibrosis via regulatory T cell through interaction with macrophage
Source: PubMed Central journal article supplement (PMC8278716; doi:10.1186/s13287-021-02469-5), 2021-07-13

Figure 1

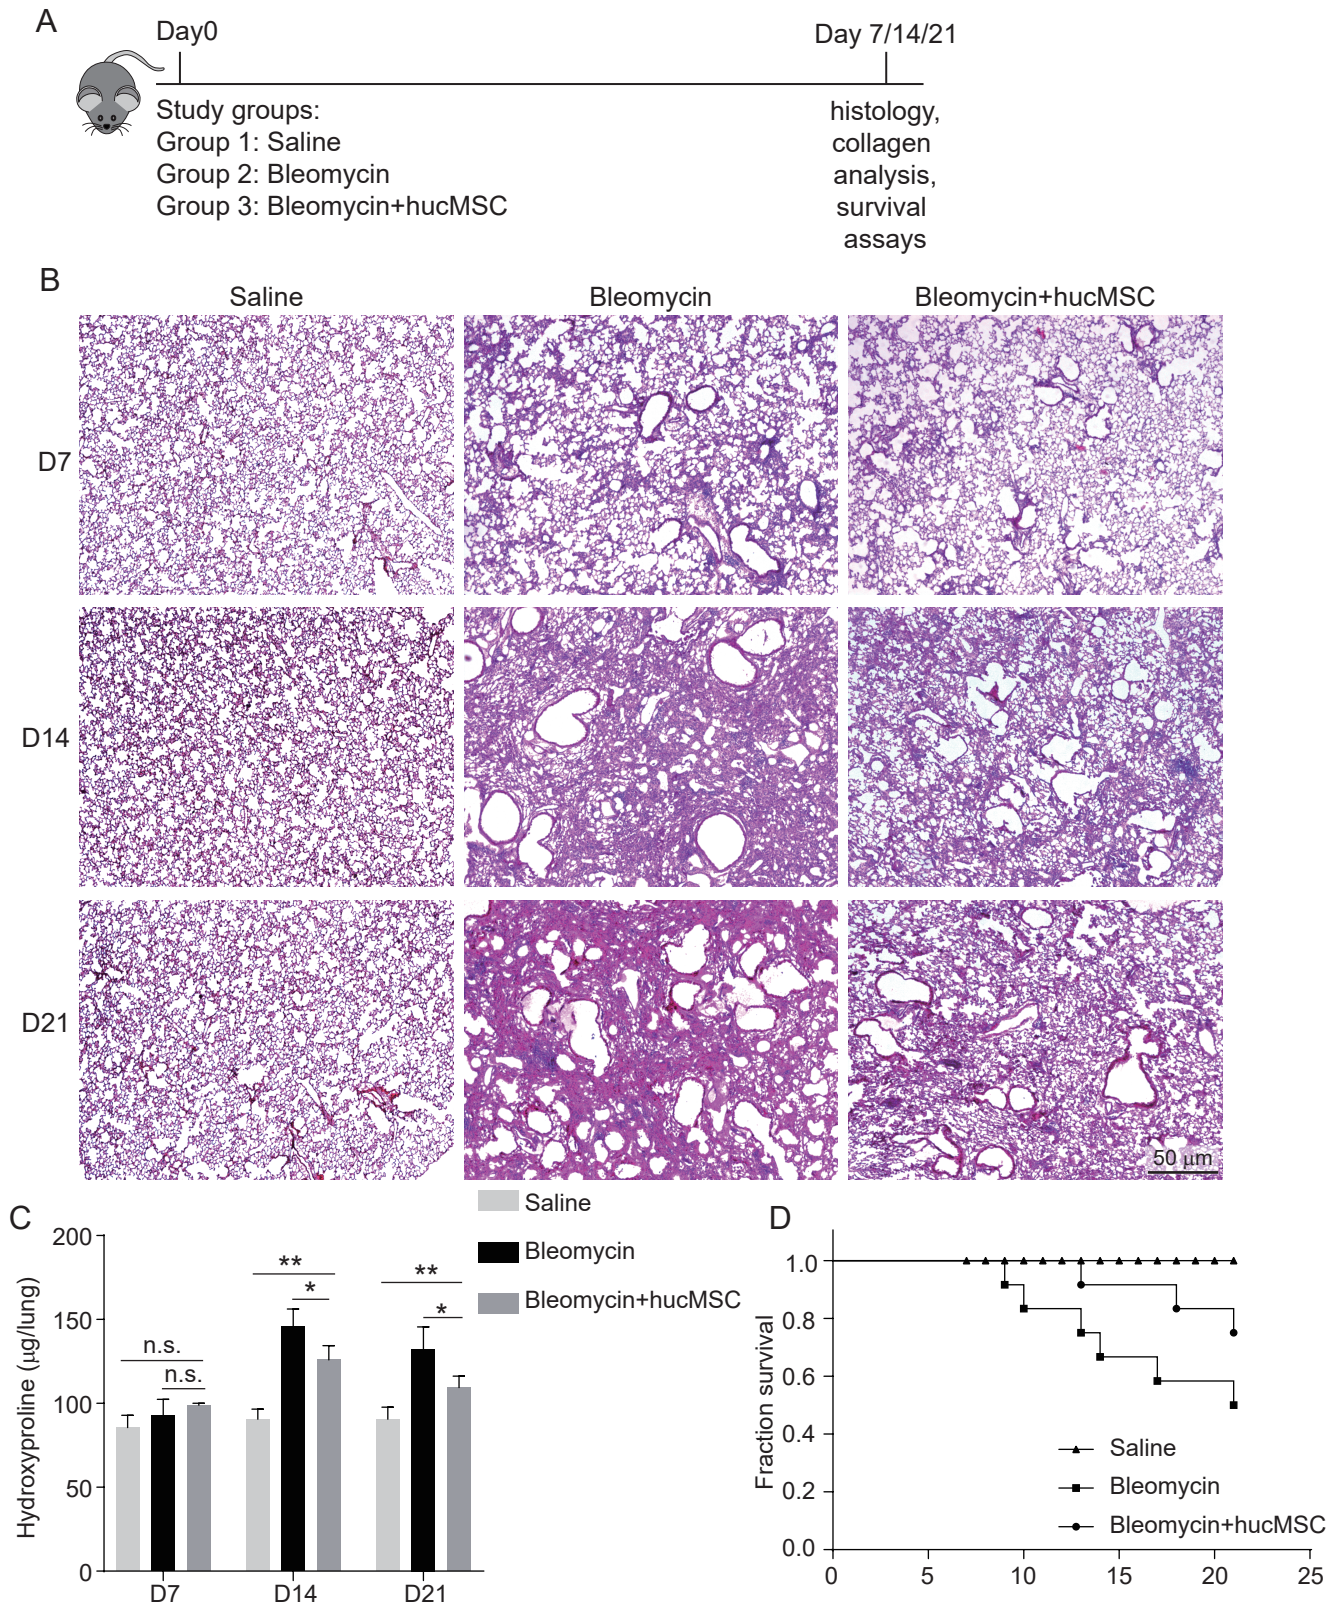

Figure 2

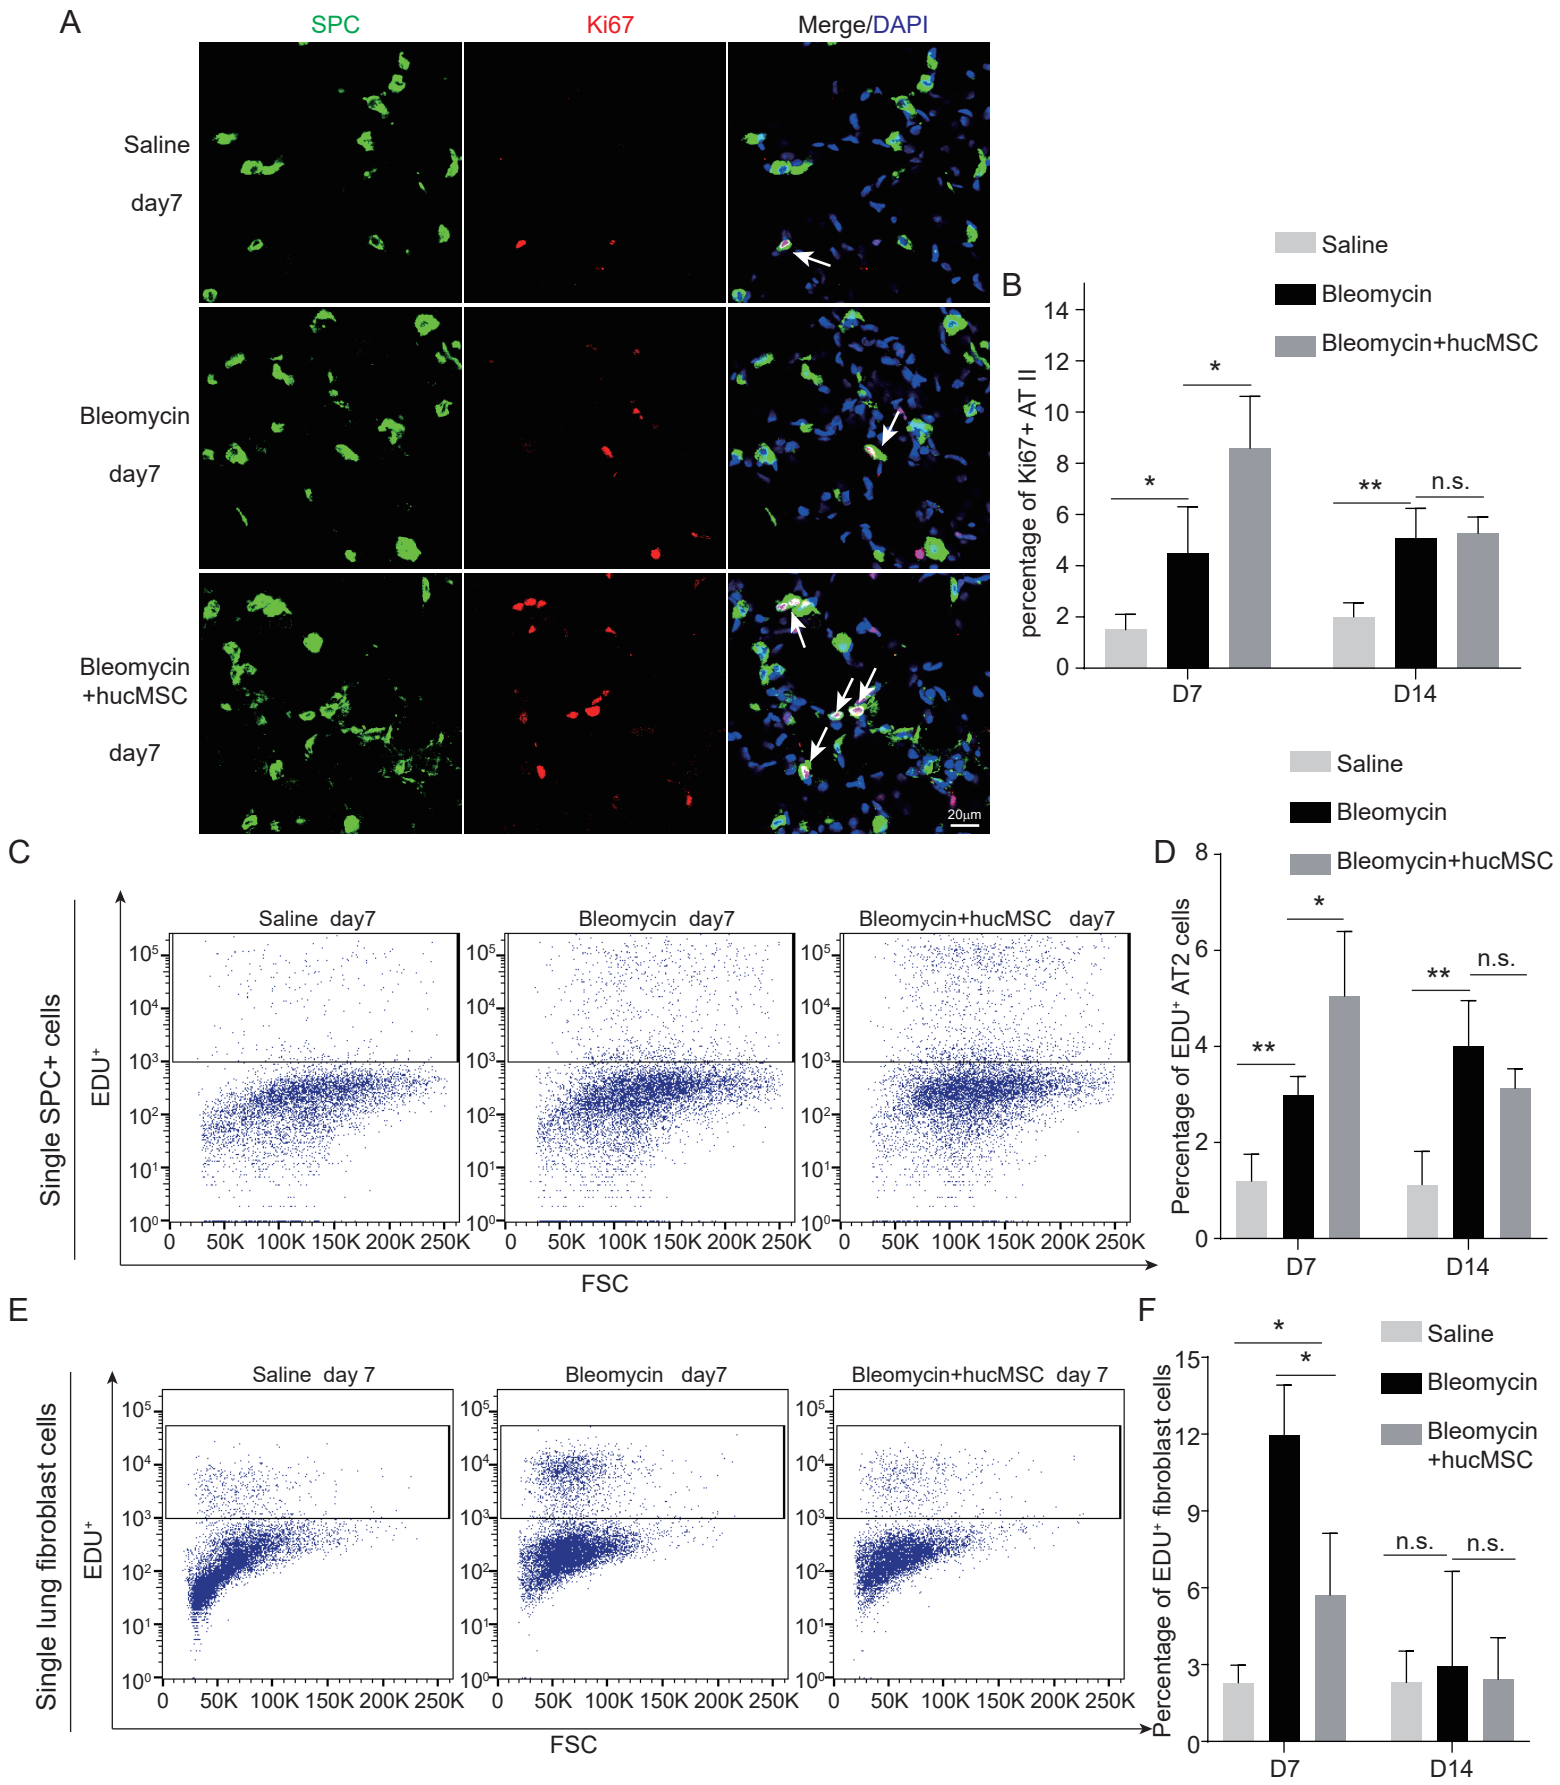

Figure 3

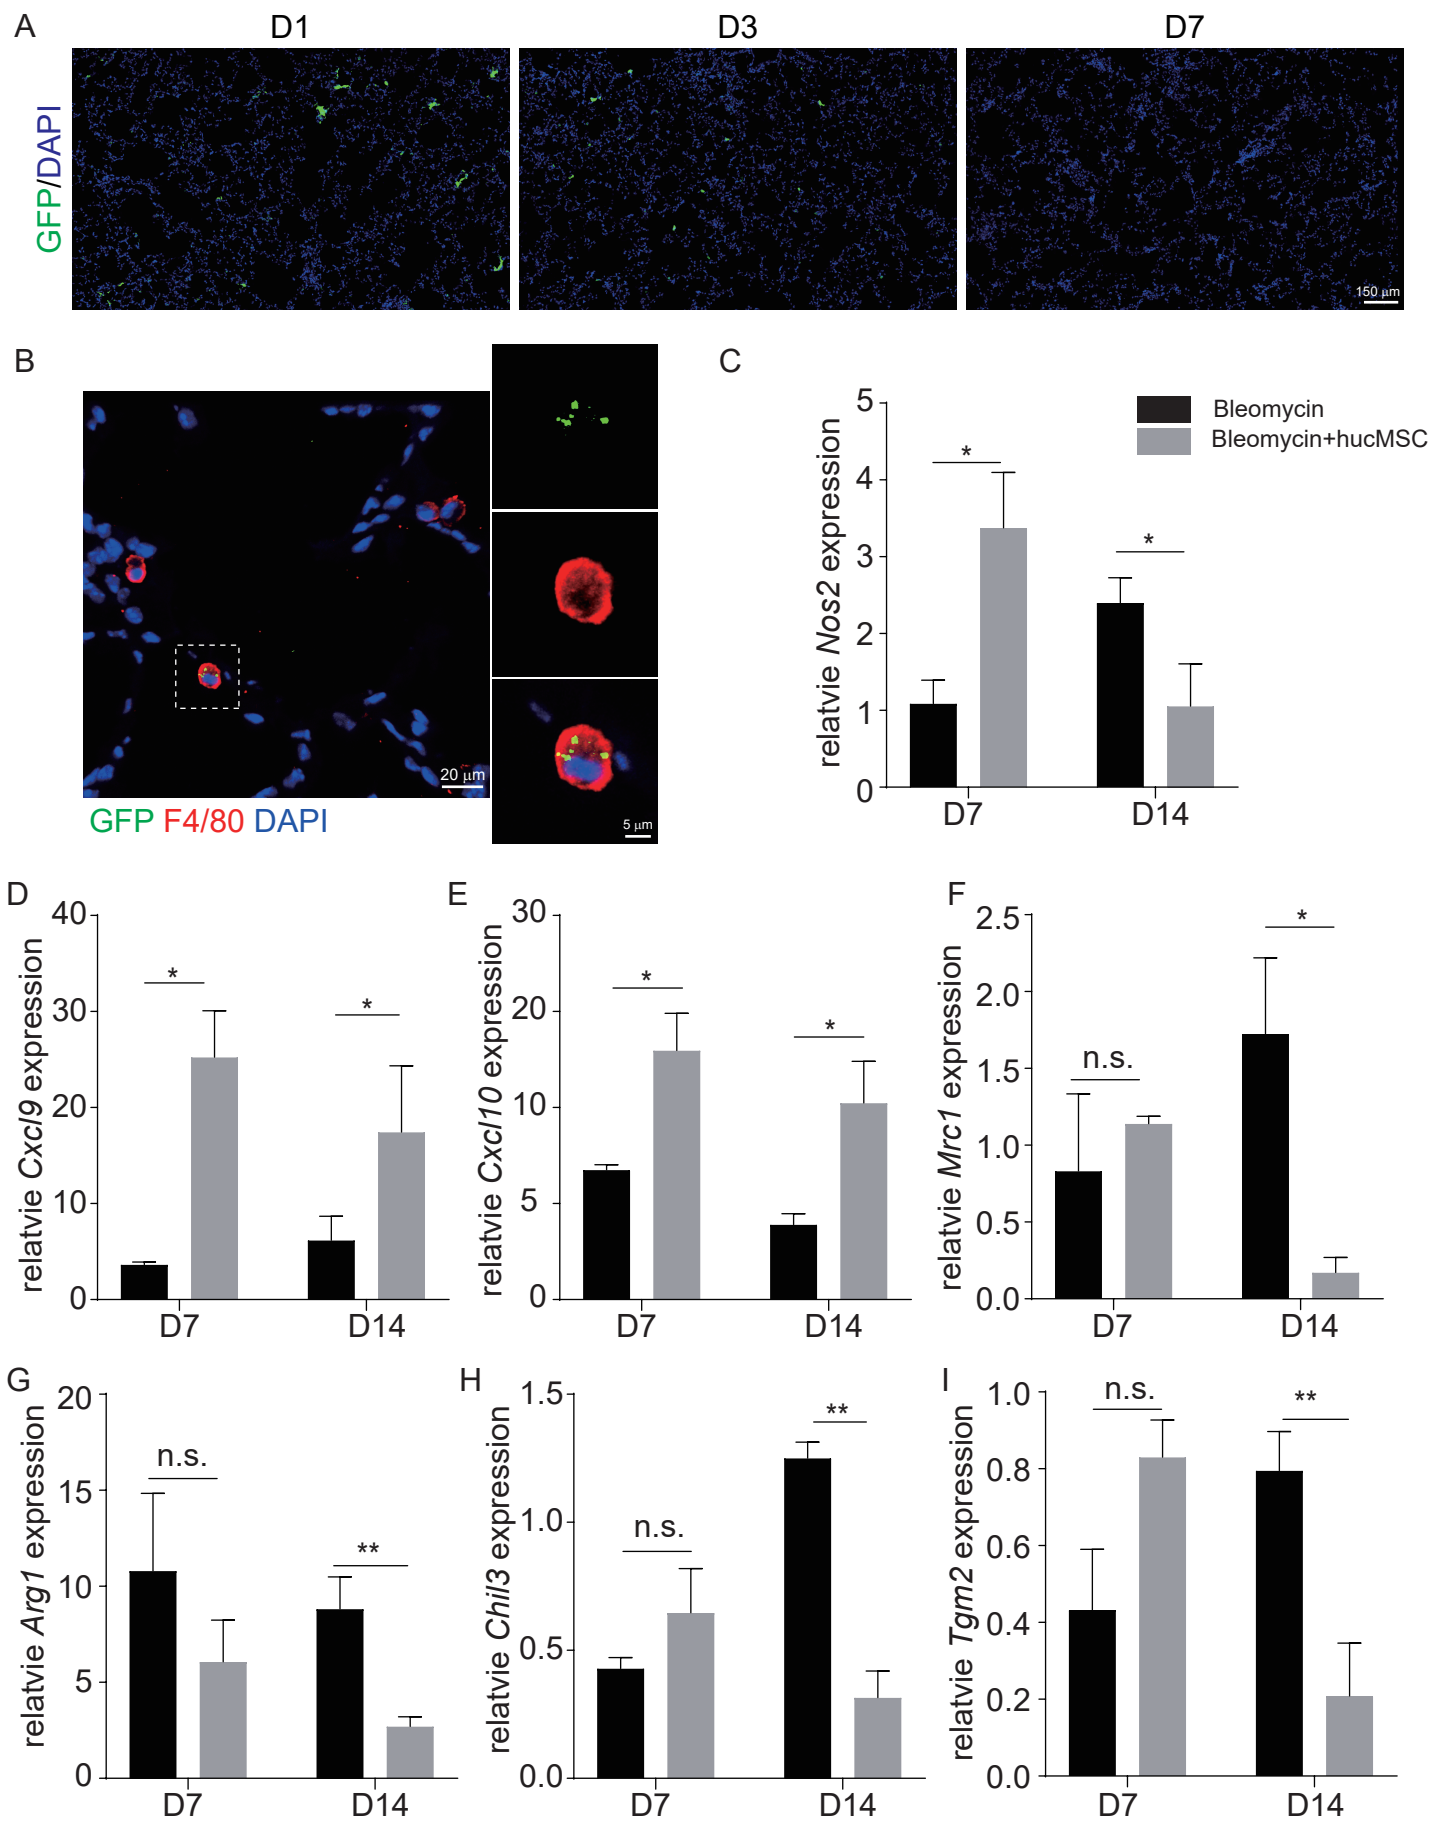

Figure 4

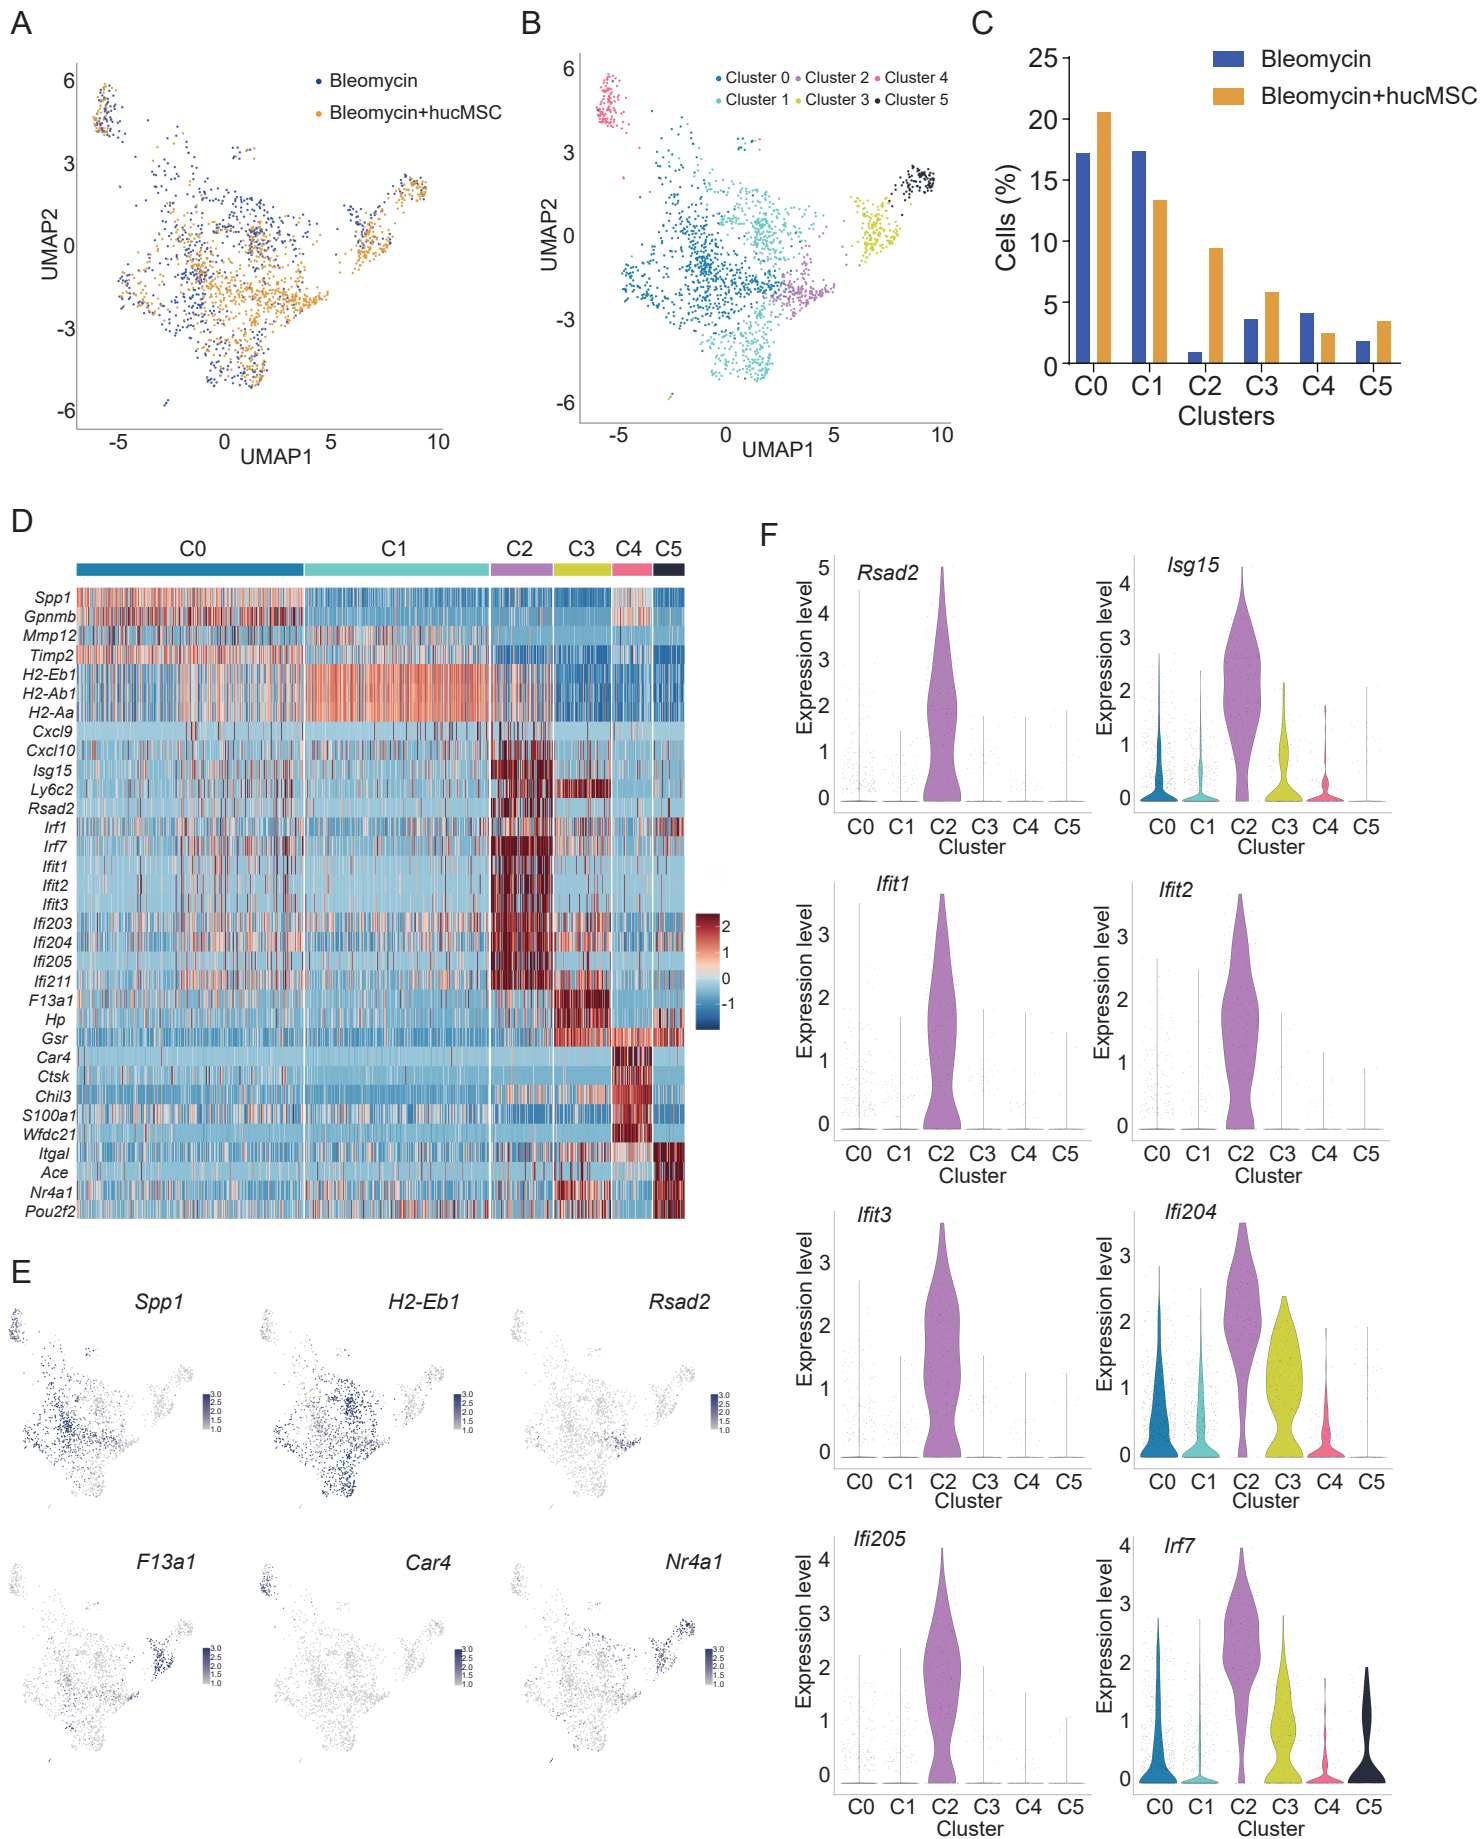

Figure 5

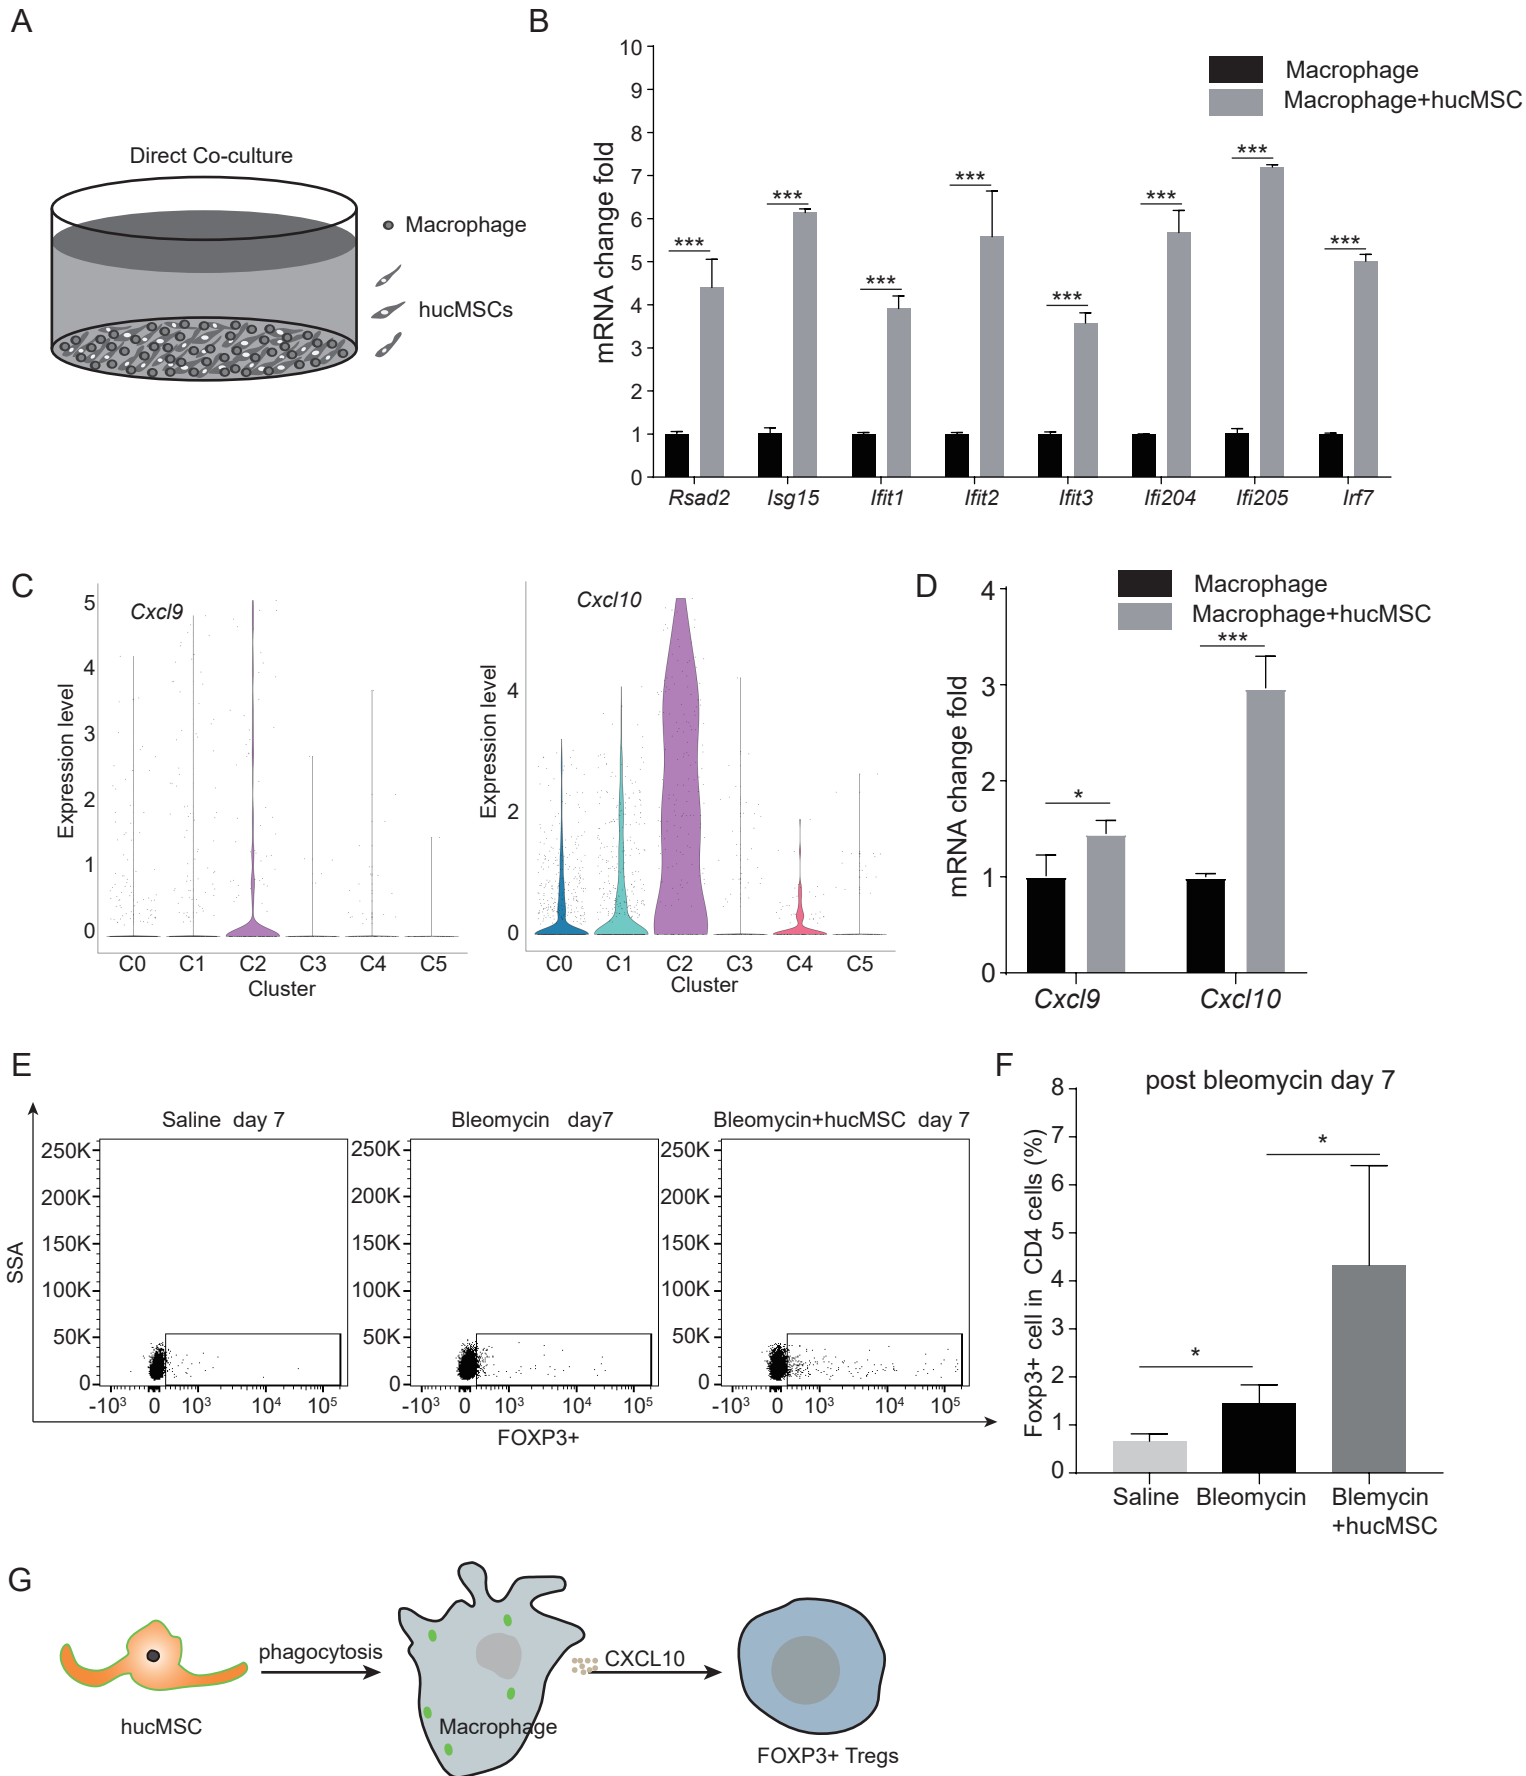

Figure S1

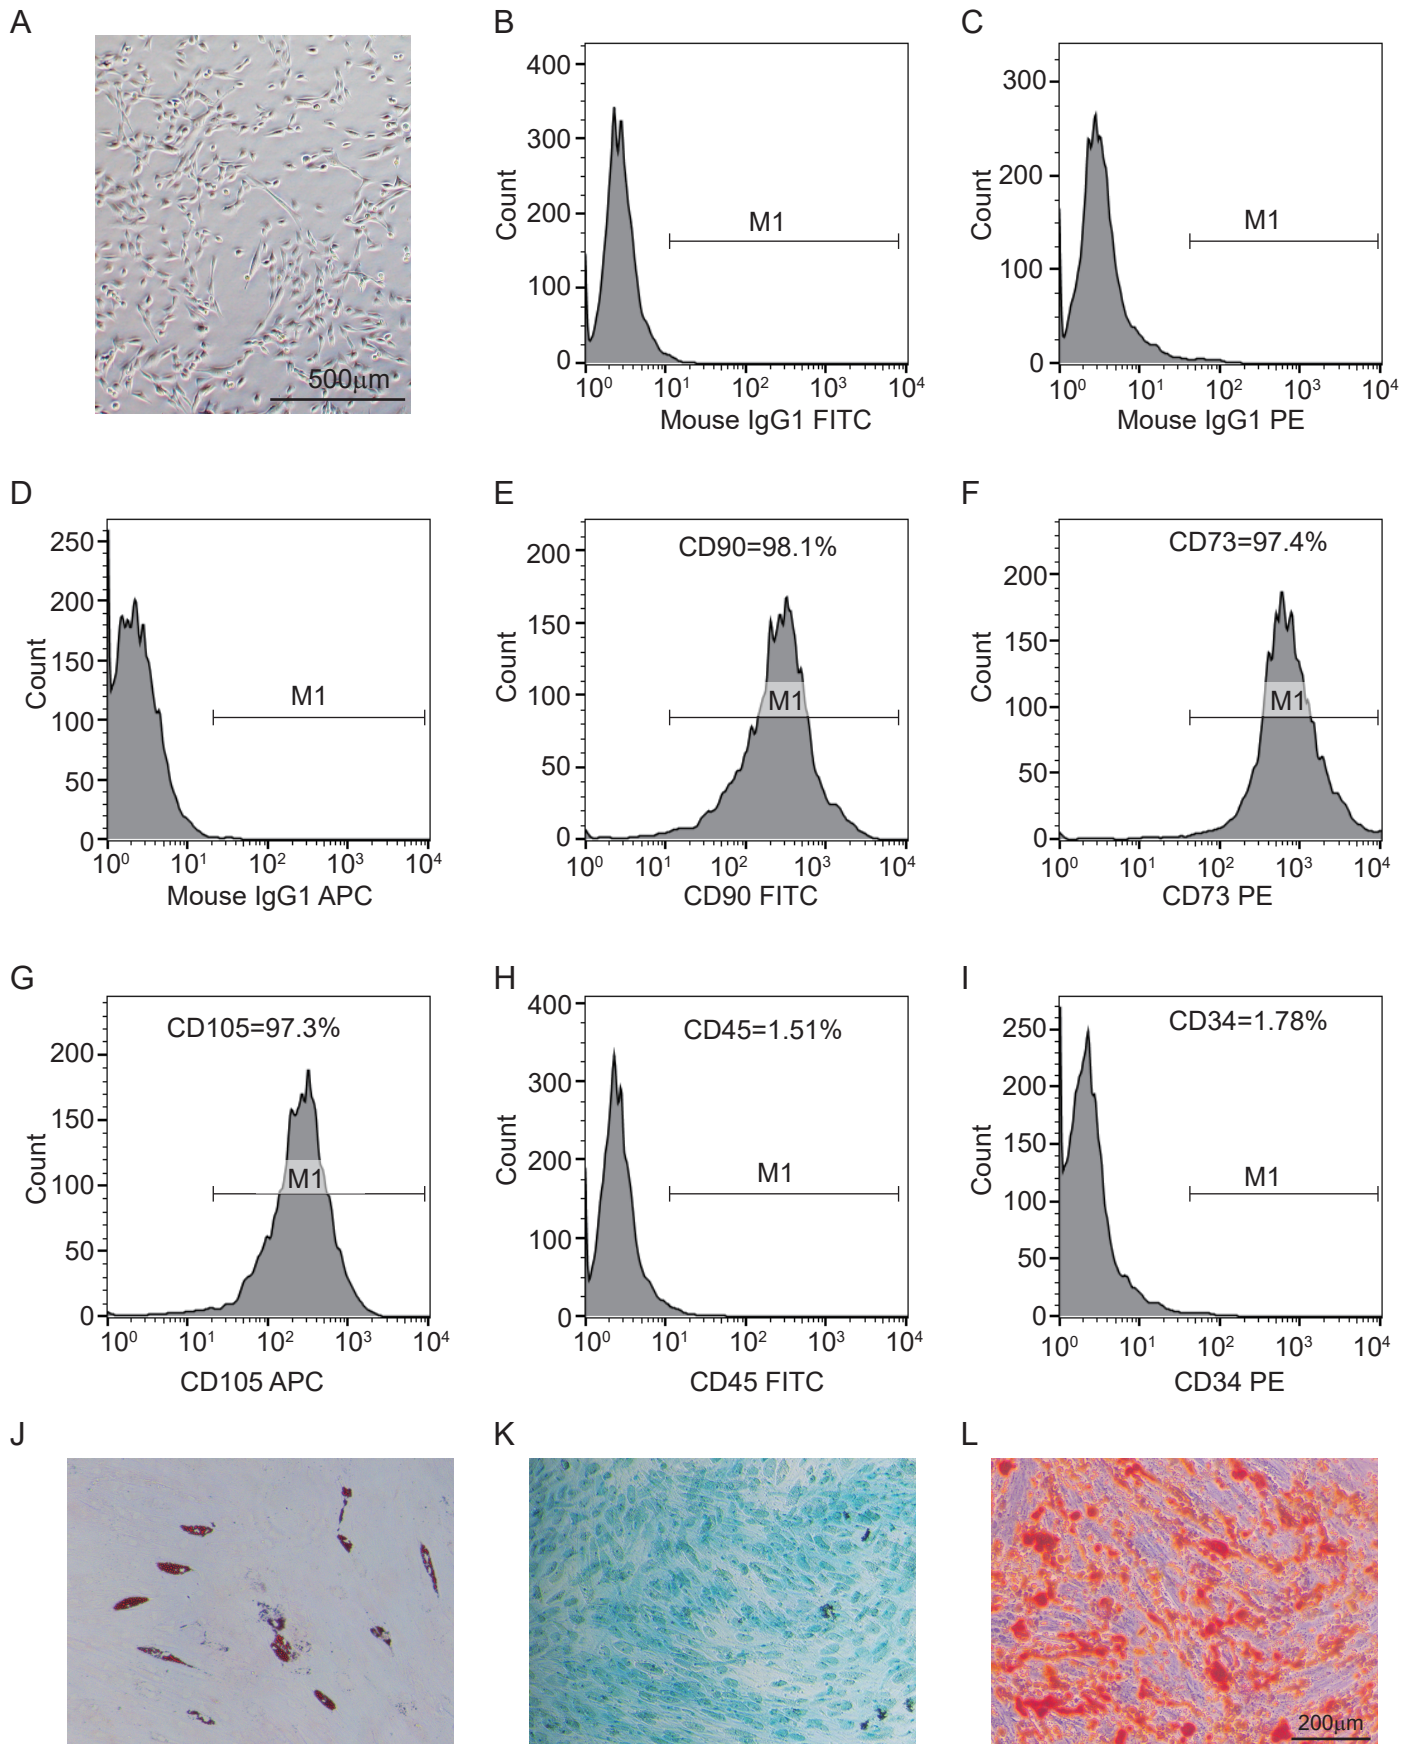

Figure S2

A

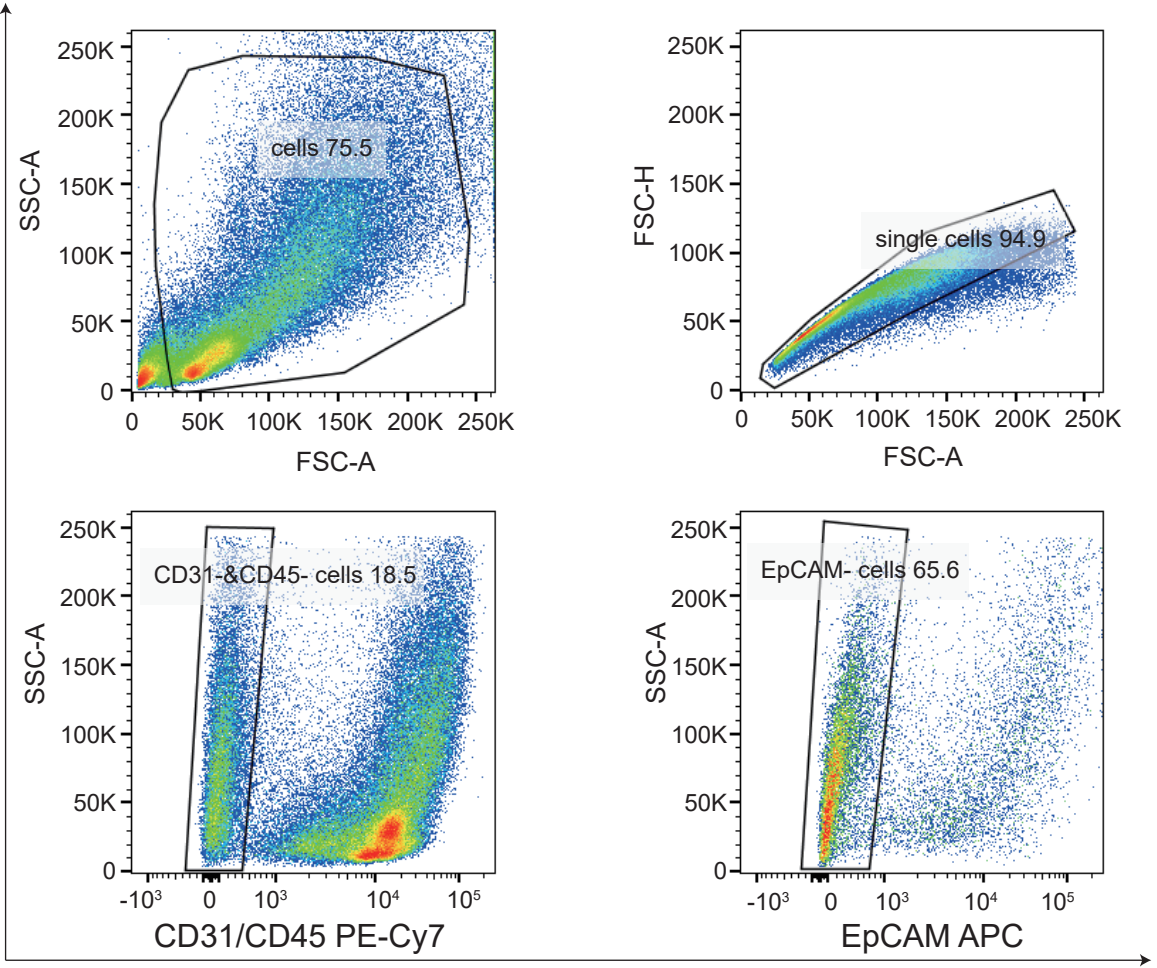

Figure S3

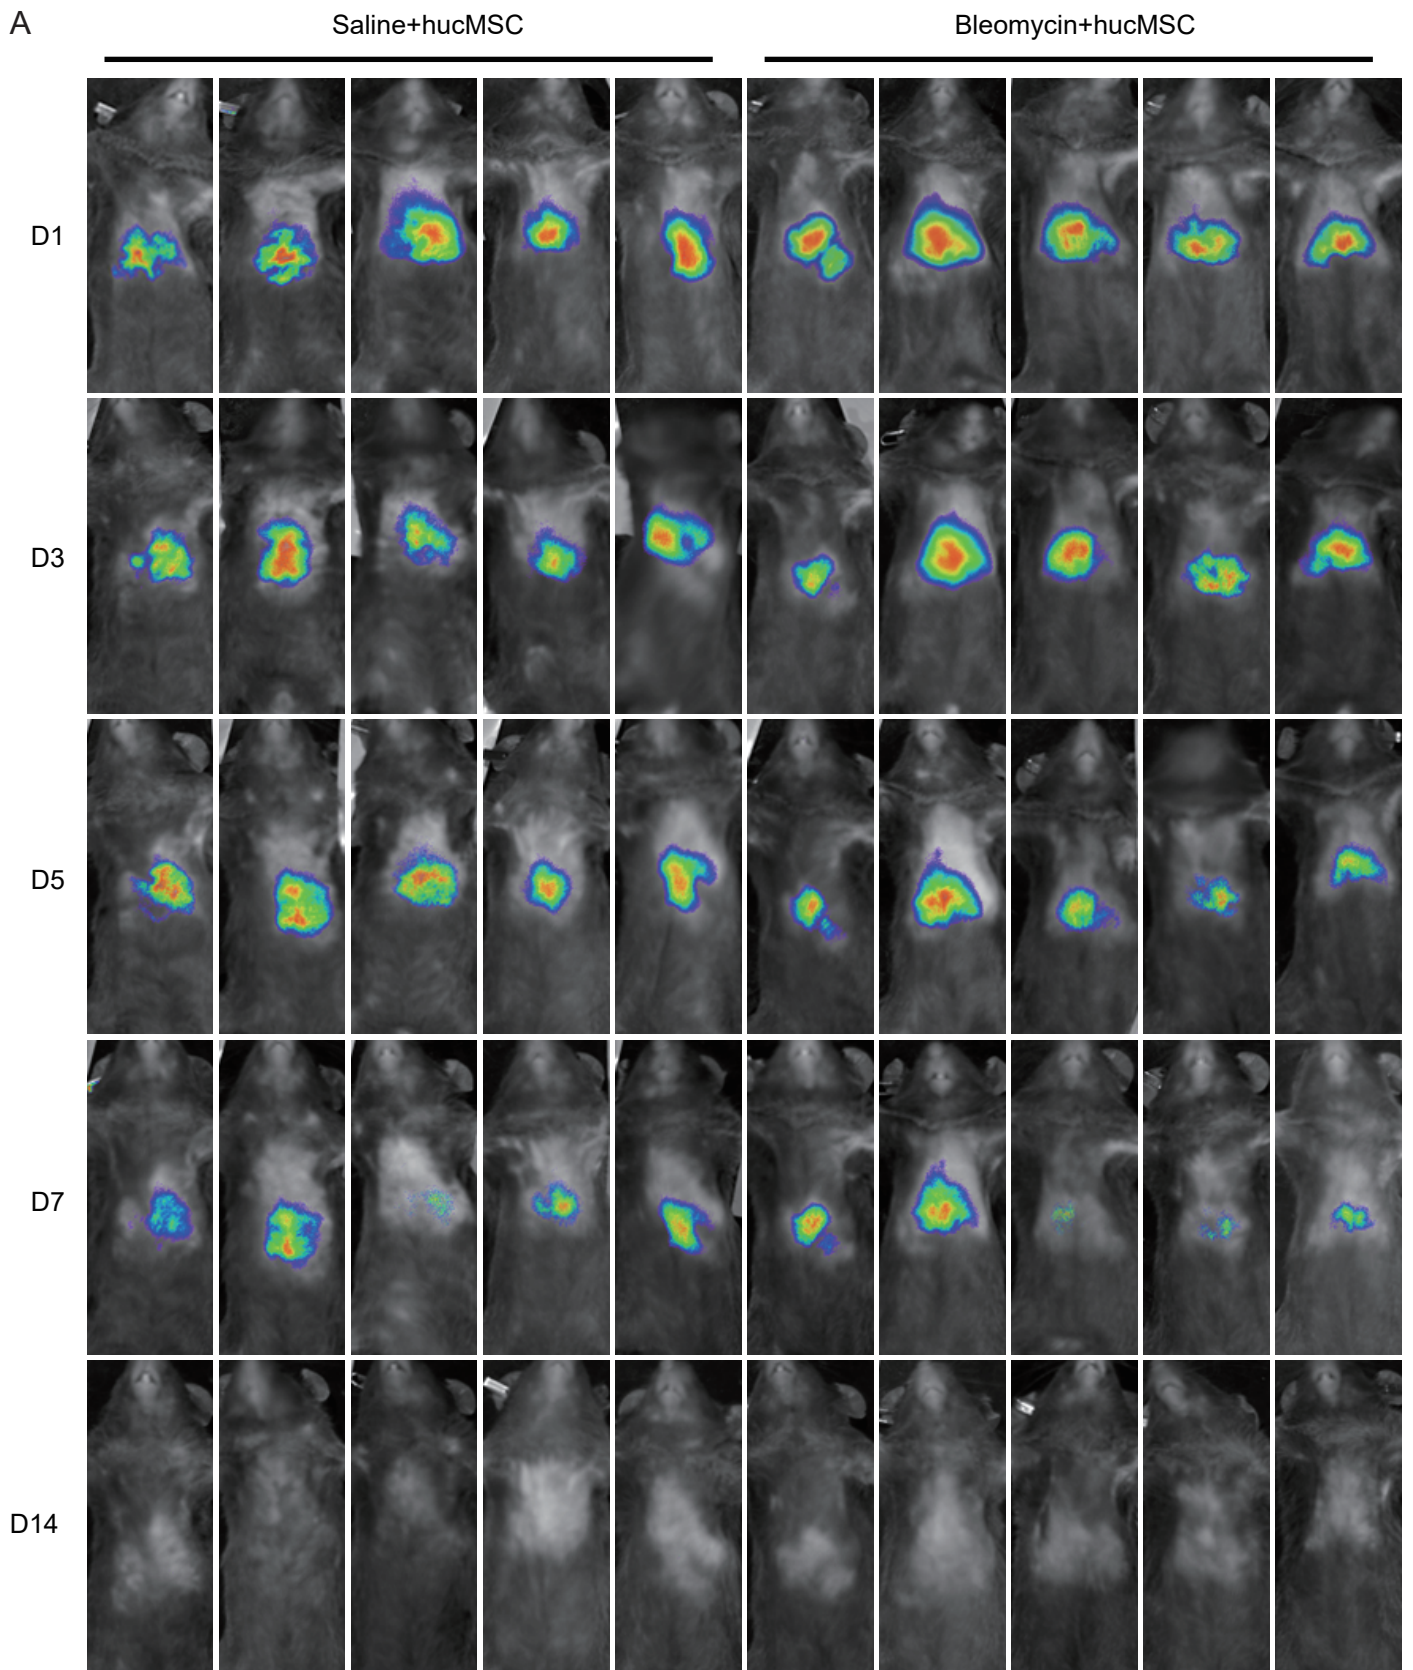



Figure S4

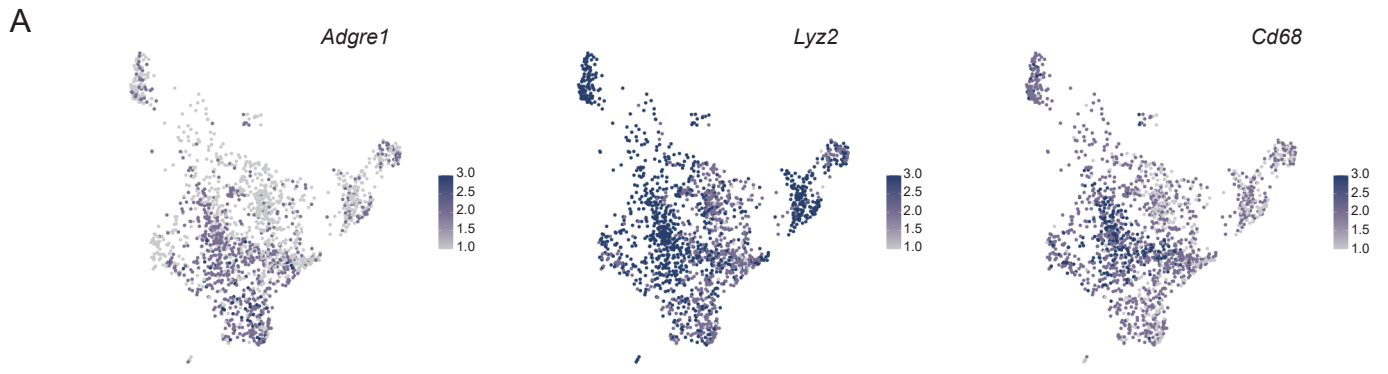

Figure S5

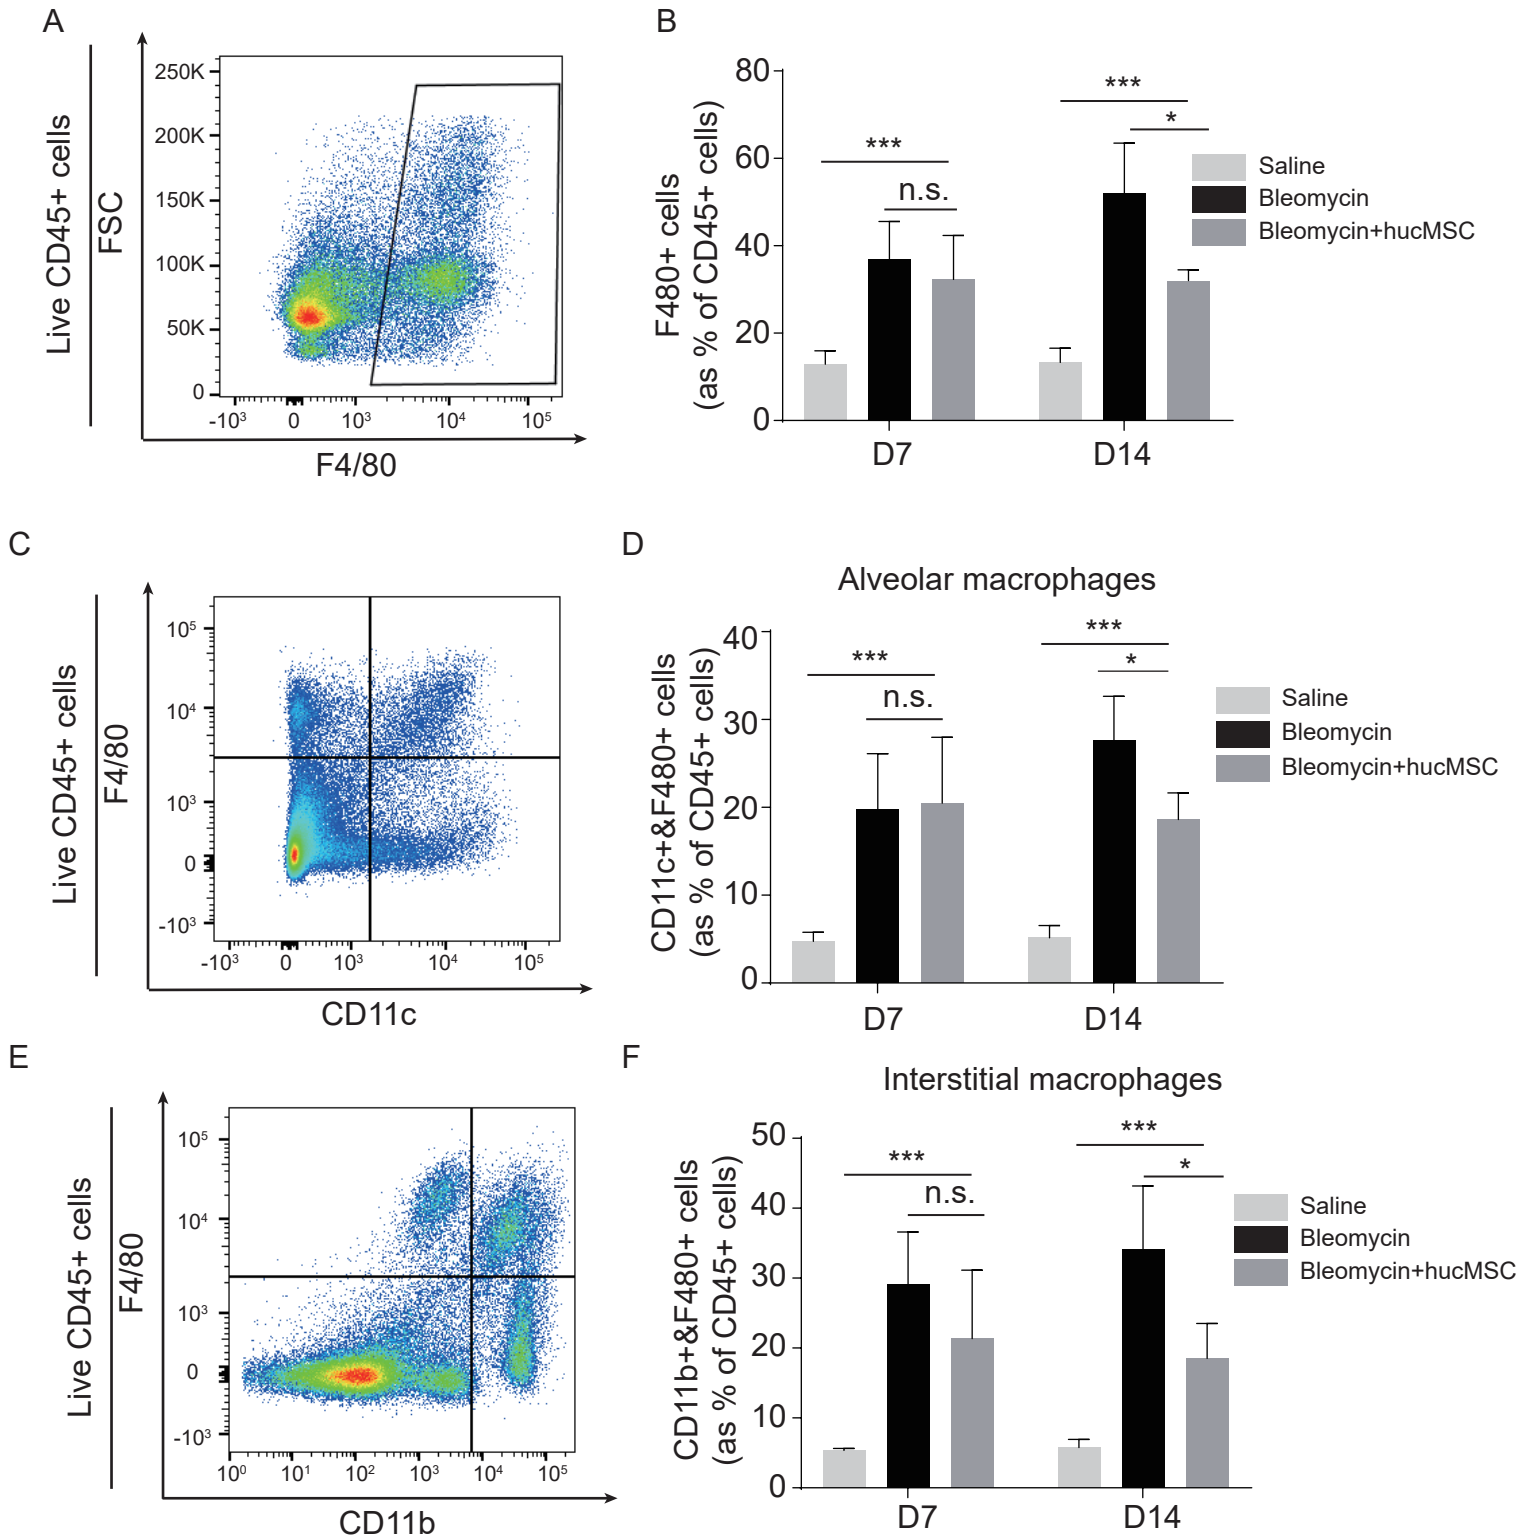

Supplement: 13287_2021_2469_MOESM1_ESM.pdf [file 13287_2021_2469_MOESM1_ESM.pdf]
